# Supplementary material
Source: PubMed Central journal article supplement (PMC3115322)
Supplement: gmb-34-2-274-suppl1.pdf [file gmb-34-2-274-suppl1.pdf]

**Table S1** - Sequences of the primers used for AFLP.

| MseI+NN            | EcoRI+NN            |
|--------------------|---------------------|
| GATGAGTCCTGAGTAAAA | GACTGCGTA CCAATTCGA |
| GATGAGTCCTGAGTAAAT | GACTGCGTA CCAATTCGT |
| GATGAGTCCTGAGTAAAC | GACTGCGTA CCAATTCGC |
| GATGAGTCCTGAGTAAAG | GACTGCGTA CCAATTCGG |
| GATGAGTCCTGAGTAATA |                     |
| GATGAGTCCTGAGTAATC |                     |
| GATGAGTCCTGAGTAATG |                     |
| GATGAGTCCTGAGTAATT |                     |
| GATGAGTCCTGAGTAACA |                     |
| GATGAGTCCTGAGTAACT |                     |
| GATGAGTCCTGAGTAACC |                     |
| GATGAGTCCTGAGTAACG |                     |
| GATGAGTCCTGAGTAAGA |                     |
| GATGAGTCCTGAGTAAGT |                     |
| GATGAGTCCTGAGTAAGC |                     |
| GATGAGTCCTGAGTAAGG |                     |
